# Supplementary material for: DrugShot: querying biomedical search terms to retrieve prioritized lists of small molecules
Source: PubMed Central journal article supplement (PMC8858480; doi:10.1186/s12859-022-04590-5), 2022-02-19
Supplement: 12859_2022_4590_MOESM1_ESM.pdf [file 12859_2022_4590_MOESM1_ESM.pdf]

**S1. Tables of associated small molecules and predicted small molecules based on L1000 signature similarity from querying the term “Atherosclerosis”**

Persistent Appyter Instance URL:

<https://appyters.maayanlab.cloud/DrugShot/aa266ea234c983fdc385c9a57691848d9423d42f/>

| Rank | Drug Name          | Publications with Search Term(s) | Publications w Search Term(s) / Total Publications |
|------|--------------------|----------------------------------|----------------------------------------------------|
| 1    | lovastatin         | 1131                             | 0.0986                                             |
| 2    | vitamin e          | 1125                             | 0.0335                                             |
| 3    | tidiacic arginine  | 1096                             | 0.0186                                             |
| 4    | aspirin            | 1094                             | 0.0236                                             |
| 5    | atorvastatin       | 1032                             | 0.1497                                             |
| 6    | angiotensin ii     | 958                              | 0.0252                                             |
| 7    | simvastatin        | 856                              | 0.1067                                             |
| 8    | ethanolamine       | 789                              | 0.0037                                             |
| 9    | estradiol valerate | 635                              | 0.0075                                             |
| 10   | androstenol        | 556                              | 0.0068                                             |
| 11   | ferrous ascorbate  | 507                              | 0.0116                                             |
| 12   | pravastatin        | 493                              | 0.1417                                             |
| 13   | epoprostenol       | 463                              | 0.0363                                             |
| 14   | ezetimibe          | 453                              | 0.1973                                             |
| 15   | niacin             | 448                              | 0.0412                                             |
| 16   | folic acid         | 429                              | 0.0109                                             |
| 17   | ticlopidine        | 417                              | 0.0369                                             |
| 18   | rosuvastatin       | 381                              | 0.1430                                             |
| 19   | clopidogrel        | 371                              | 0.0393                                             |
| 20   | icosapent          | 365                              | 0.0554                                             |

Table of top 20 associated small molecules produced from a DrugShot query with the term “Atherosclerosis”.

| Rank | Drug Name           | Score   |
|------|---------------------|---------|
| 1    | CAM-9-027-3         | 0.1654  |
| 2    | SA-1478088          | 0.1622  |
| 3    | VU-0418939-2        | 0.1618  |
| 4    | BMS-536924          | 0.1614  |
| 5    | methyl-benzethonium | 0.1585  |
| 6    | BRD-K91663486       | 0.15574 |
| 7    | IKK-16              | 0.15572 |
| 8    | BRD-K73008154       | 0.15412 |
| 9    | TG-101348           | 0.154   |
| 10   | BRD-K63423329       | 0.1518  |
| 11   | PP-110              | 0.1515  |
| 12   | BRD-K30351863       | 0.1513  |
| 13   | BRD-K87125912       | 0.1507  |
| 14   | RS-17053            | 0.1497  |
| 15   | BJM-CSC-15          | 0.14937 |
| 16   | thapsigargin        | 0.14936 |
| 17   | BRD-K41335306       | 0.149   |
| 18   | BRD-K02025760       | 0.1478  |
| 19   | BRD-K85211514       | 0.1469  |
| 20   | BRD-K74461819       | 0.1465  |

Table of top 20 predicted small molecules associated with “Atherosclerosis” based on similarity of drug-induced gene expression signatures.

**S2.** Tables of associated small molecules and predicted small molecules based on L1000 signature similarity from querying the term “Statin”

Persistent Appyter Instance URL:

<https://appyters.maayanlab.cloud/DrugShot/65beec341cde99f6fddf087108bcd492f11424a9/>

| Rank | Drug Name       | Publications with Search Term(s) | Publications w Search Term(s) / Total Publications |
|------|-----------------|----------------------------------|----------------------------------------------------|
| 1    | lovastatin      | 11455                            | 0.999                                              |
| 2    | simvastatin     | 8009                             | 0.998                                              |
| 3    | atorvastatin    | 6894                             | 1                                                  |
| 4    | pravastatin     | 3478                             | 1                                                  |
| 5    | rosuvastatin    | 2665                             | 1                                                  |
| 6    | ezetimibe       | 1609                             | 0.7008                                             |
| 7    | aspirin         | 1137                             | 0.0245                                             |
| 8    | fluvastatin     | 1056                             | 0.7431                                             |
| 9    | mevalonic acid  | 1052                             | 0.2863                                             |
| 10   | niacin          | 739                              | 0.0679                                             |
| 11   | pitavastatin    | 677                              | 1                                                  |
| 12   | fenofibrate     | 533                              | 0.1926                                             |
| 13   | cerivastatin    | 526                              | 1                                                  |
| 14   | mevastatin      | 457                              | 1                                                  |
| 15   | ubidecarenone   | 395                              | 0.0402                                             |
| 16   | gemfibrozil     | 366                              | 0.2633                                             |
| 17   | ticlopidine     | 336                              | 0.0297                                             |
| 18   | clopidogrel     | 330                              | 0.0350                                             |
| 19   | clofibrlic-acid | 328                              | 0.0676                                             |
| 20   | metformin       | 307                              | 0.0204                                             |

Table of top 20 associated small molecules produced from a DrugShot query with the term “Statin”.

| Rank | Drug Name           | Score  |
|------|---------------------|--------|
| 1    | BMS-536924          | 0.1808 |
| 2    | PP-110              | 0.1757 |
| 3    | CAM-9-027-3         | 0.175  |
| 4    | TG-101348           | 0.1719 |
| 5    | BRD-K91663486       | 0.1699 |
| 6    | BRD-K41335306       | 0.1688 |
| 7    | BRD-K63423329       | 0.1682 |
| 8    | BRD-K87125912       | 0.1678 |
| 9    | BRD-K73008154       | 0.1655 |
| 10   | BRD-K74461819       | 0.1651 |
| 11   | JW-7-24-1           | 0.165  |
| 12   | BIBX-1382           | 0.1632 |
| 13   | SA-1478088          | 0.1623 |
| 14   | KU-0060648          | 0.1616 |
| 15   | BRD-K49477330       | 0.1606 |
| 16   | methyl-benzethonium | 0.1601 |
| 17   | BRD-K30351863       | 0.1585 |
| 18   | IKK-16              | 0.1584 |
| 19   | BRD-K85211514       | 0.1578 |
| 20   | WYE-125132          | 0.1577 |

Table of top 20 predicted small molecules associated with “Statin” based on similarity of drug-induced gene expression signatures.

**S3.** Tables of associated small molecules and predicted small molecules based on L1000 signature similarity from querying the term “Cholesterol”

Persistent Appyter Instance URL:

<https://appyters.maayanlab.cloud/DrugShot/1518fa951ce6f72bb00162fa7213cf0cdd07dd15/>

| Rank | Drug Name                | Publications with Search Term(s) | Publications w Search Term(s) / Total Publications |
|------|--------------------------|----------------------------------|----------------------------------------------------|
| 1    | lovastatin               | 5416                             | 0.4723                                             |
| 2    | simvastatin              | 3685                             | 0.4594                                             |
| 3    | androstenol              | 3450                             | 0.0419                                             |
| 4    | atorvastatin             | 3106                             | 0.4505                                             |
| 5    | vitamin e                | 3020                             | 0.0899                                             |
| 6    | estradiol valerate       | 2715                             | 0.0320                                             |
| 7    | phosphatidylethanolamine | 1923                             | 0.1482                                             |
| 8    | pravastatin              | 1865                             | 0.5362                                             |
| 9    | ethanolamine             | 1840                             | 0.0087                                             |
| 10   | deoxycholic acid         | 1761                             | 0.1477                                             |
| 11   | ezetimibe                | 1736                             | 0.7561                                             |
| 12   | levothyroxine            | 1688                             | 0.0343                                             |
| 13   | mevalonic acid           | 1686                             | 0.4588                                             |
| 14   | ferrous ascorbate        | 1545                             | 0.0355                                             |
| 15   | ceramide                 | 1458                             | 0.1033                                             |
| 16   | clofibric-acid           | 1440                             | 0.2968                                             |
| 17   | hydrocortisone           | 1364                             | 0.0182                                             |
| 18   | retinol                  | 1270                             | 0.0280                                             |
| 19   | niacin                   | 1226                             | 0.1127                                             |
| 20   | rosuvastatin             | 1154                             | 0.4330                                             |

Table of top 20 associated small molecules produced from a DrugShot query with the term “Cholesterol”.

| Rank | Drug Name            | Score   |
|------|----------------------|---------|
| 1    | VU-0418939-2         | 0.1567  |
| 2    | SA-1478088           | 0.1489  |
| 3    | CAM-9-027-3          | 0.14884 |
| 4    | BMS-536924           | 0.14876 |
| 5    | BG-1024              | 0.1464  |
| 6    | purvalanol-a         | 0.1431  |
| 7    | methyl-benzethonium  | 0.1401  |
| 8    | BRD-K93623501        | 0.1389  |
| 9    | IKK-16               | 0.1384  |
| 10   | BRD-K87125912        | 0.13835 |
| 11   | BRD-K85211514        | 0.13830 |
| 12   | MG-132               | 0.1355  |
| 13   | avicin-d             | 0.1351  |
| 14   | 5-nonyloxytryptamine | 0.1346  |
| 15   | BRD-K63423329        | 0.1341  |
| 16   | thapsigargin         | 0.1334  |
| 17   | chlorhexidine        | 0.1326  |
| 18   | ivermectin           | 0.1324  |
| 19   | BRD-K14749055        | 0.13198 |
| 20   | KU-0060648           | 0.13190 |

Table of top 20 predicted small molecules associated with “Cholesterol” based on similarity of drug-induced gene expression signatures.
